# Supplementary material for: Transplantation of exogenous mitochondria mitigates myocardial dysfunction after cardiac arrest
Source: eLife journal article supplement (doi:10.7554/elife.98554), 2024-09-02

Figure 6—source data 1. PDF file containing uncropped western blots with labeling for panel G.

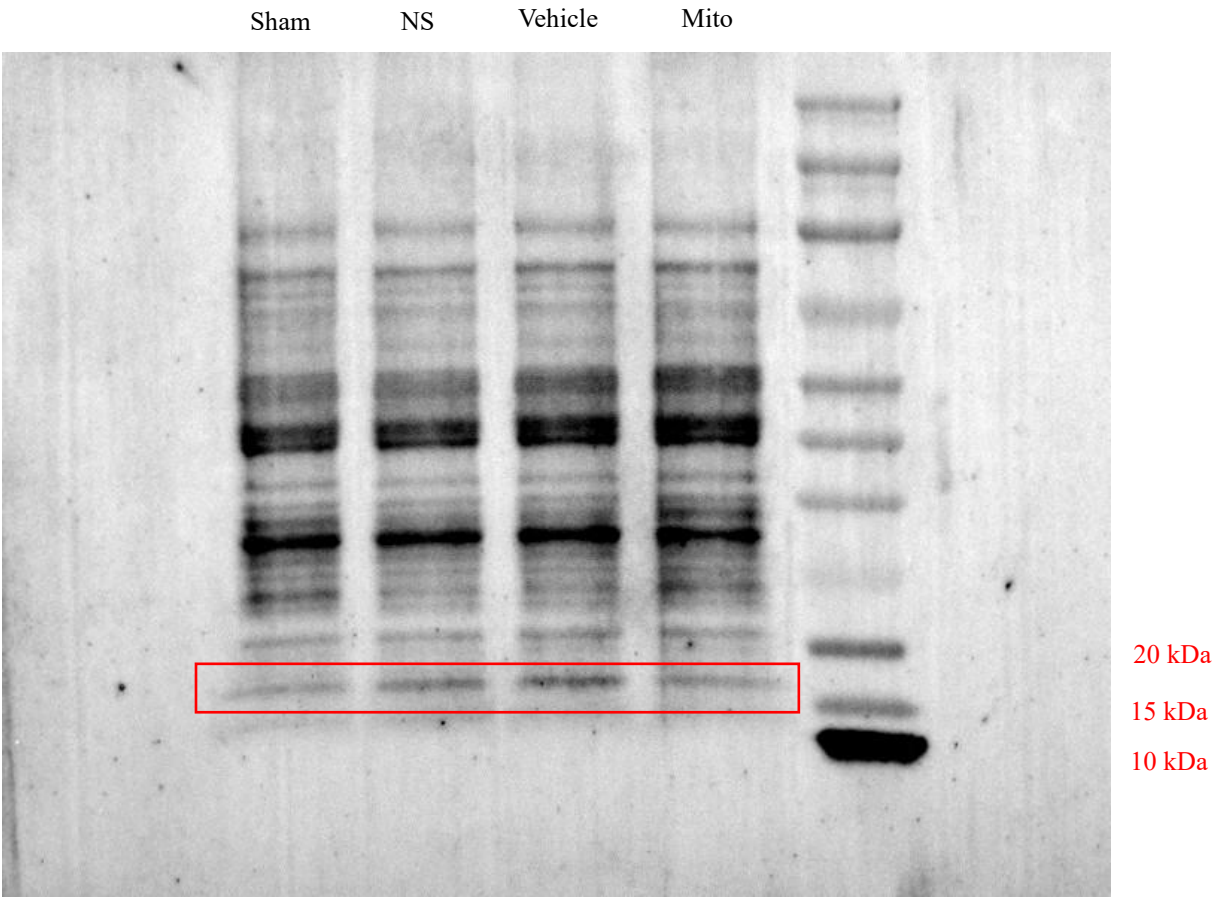

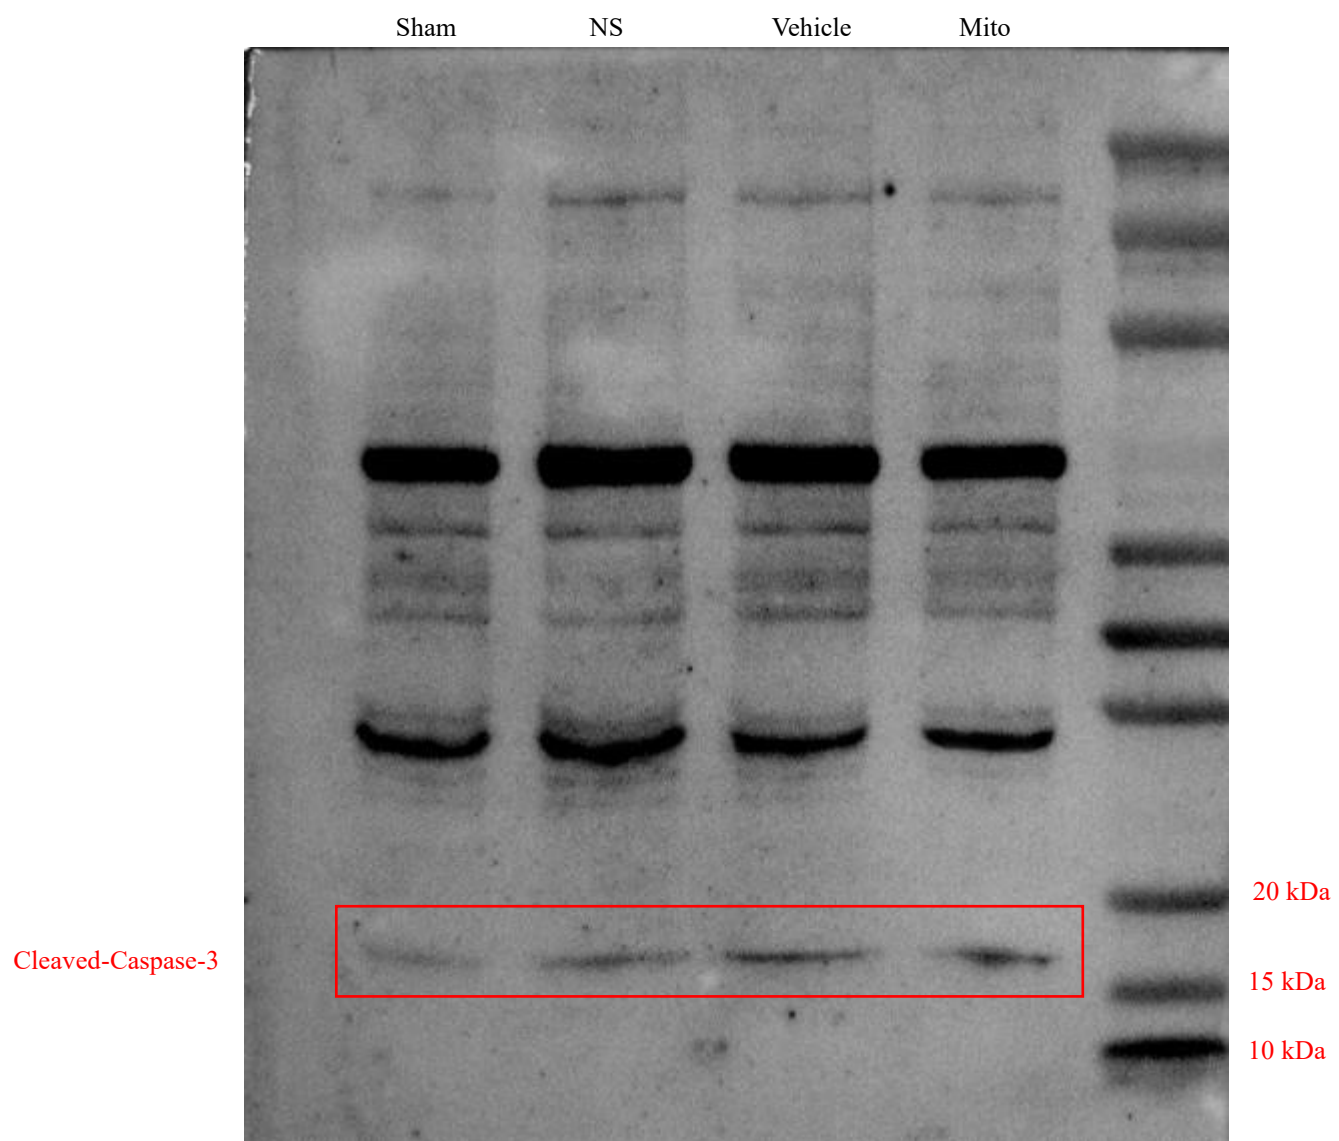

Sham

NS

Vehicle

Mito

Cleaved-Caspase-3

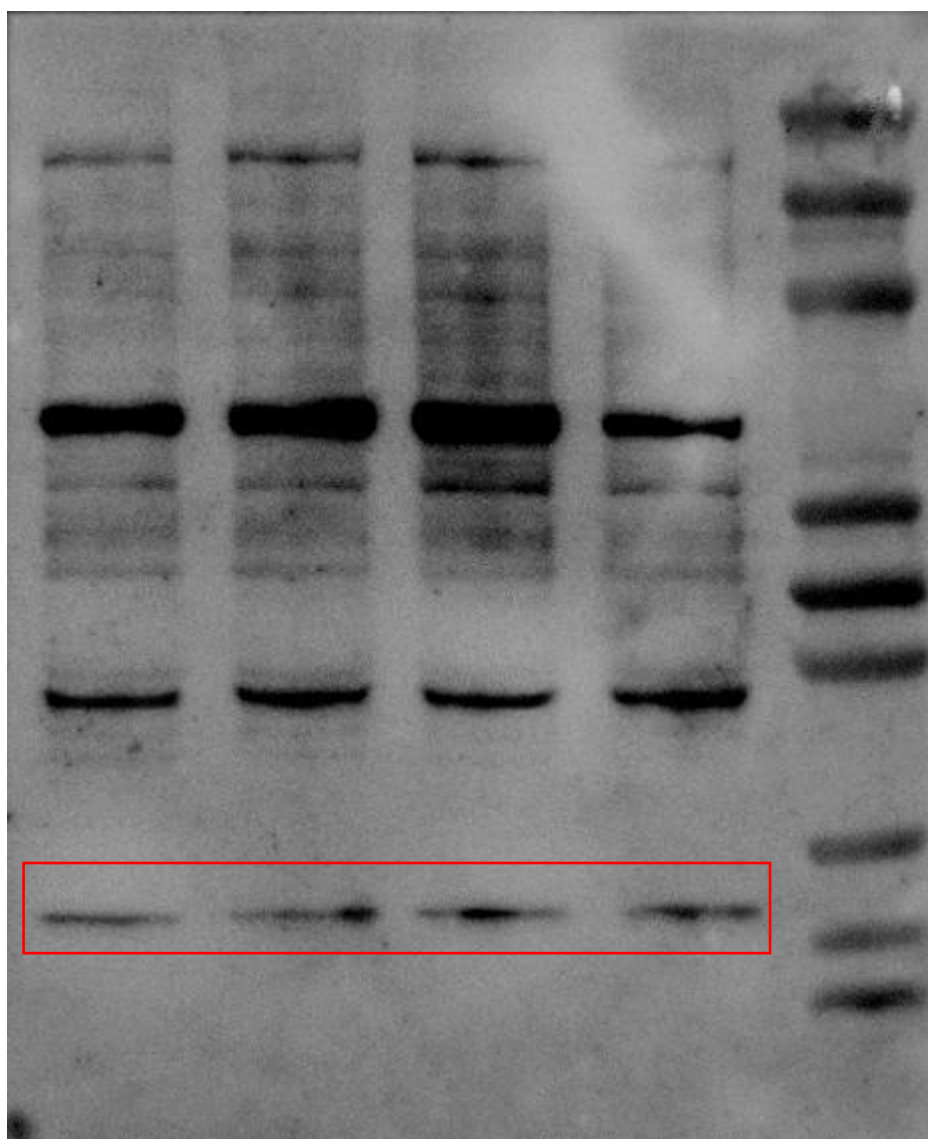

20 kDa

15 kDa

10 kDa

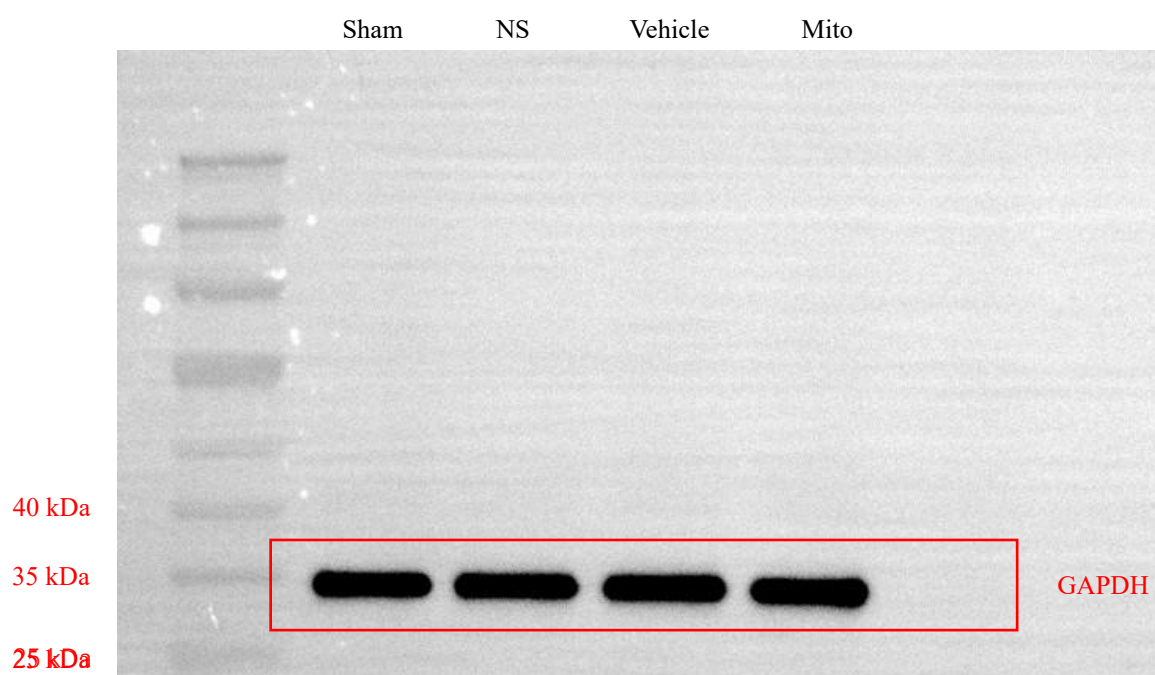

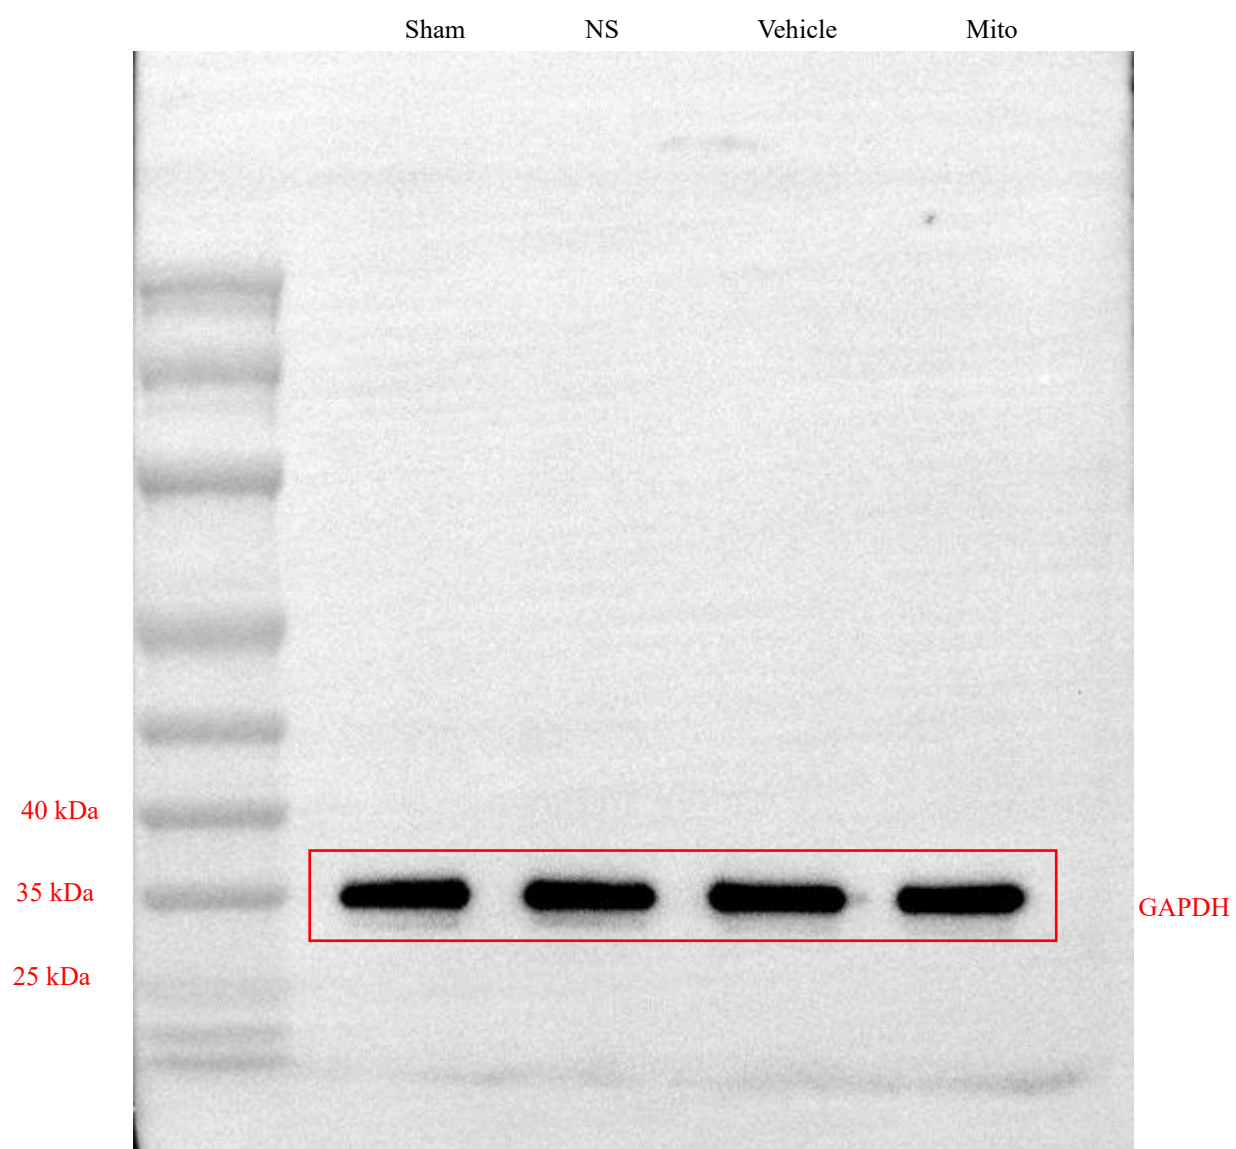

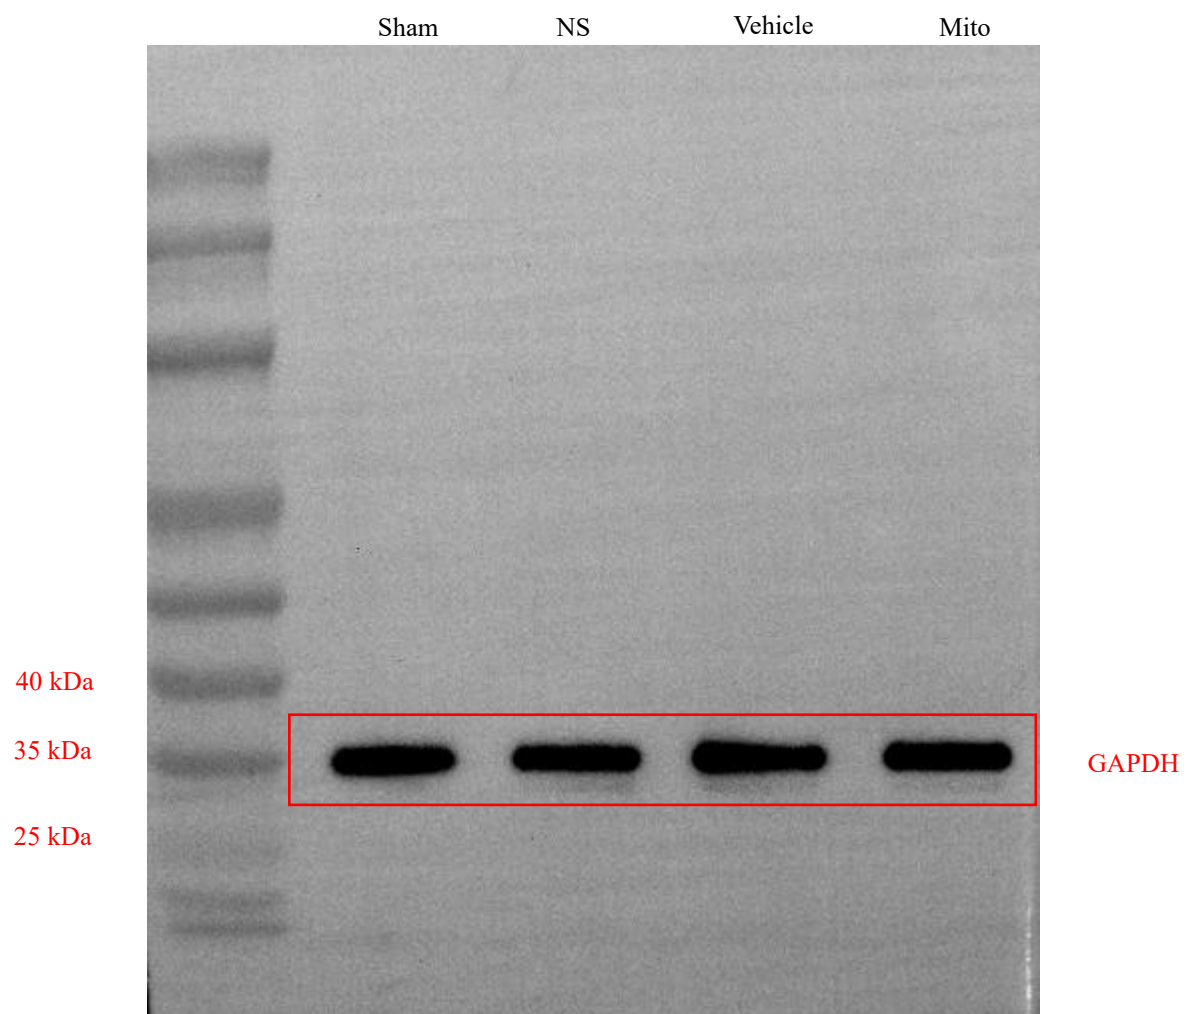

Supplement: fig6-data1 [file elife-98554-fig6-data1-v1.zip]
