# Supplementary figures and images for: Transplantation of exogenous mitochondria mitigates myocardial dysfunction after cardiac arrest
Source: eLife journal article supplement (doi:10.7554/elife.98554), 2024-09-02

Figure 3—source data 1. PDF file containing uncropped western blots with labeling for panel B.

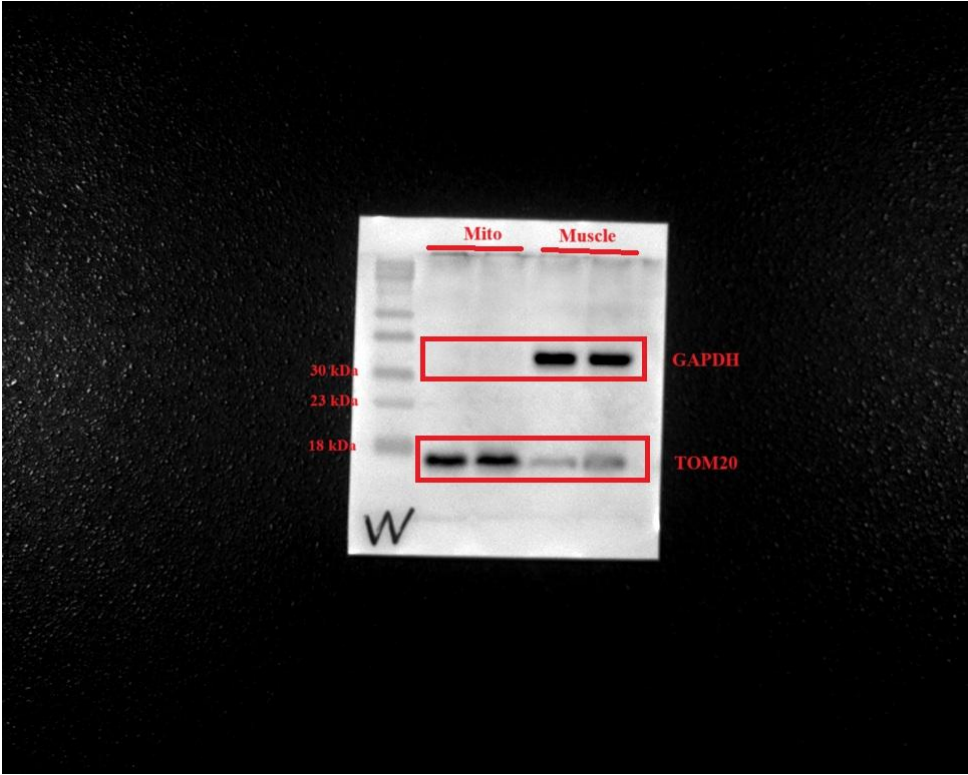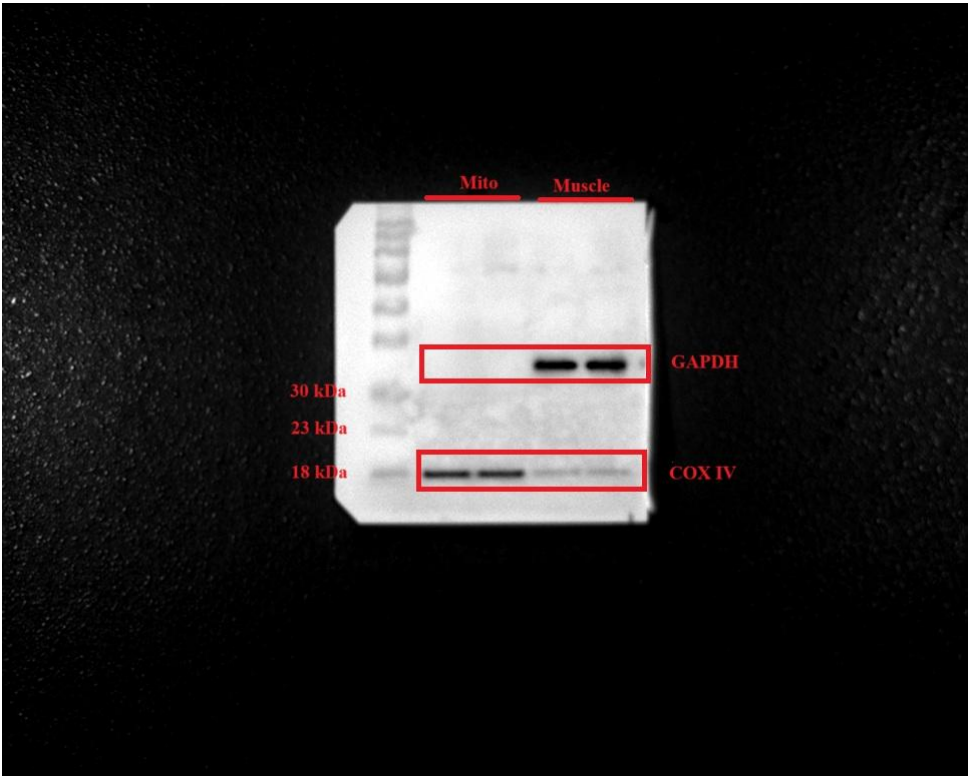

Supplement: fig3-data1 [file elife-98554-fig3-data1-v1.zip]
